# Supplementary material for: B7-H7 (HHLA2) inhibits T-cell activation and proliferation in the presence of TCR and CD28 signaling
Source: PubMed Central journal article supplement (PMC8166953; doi:10.1038/s41423-020-0361-7), 2020-01-31

# Supplementary Figure 1

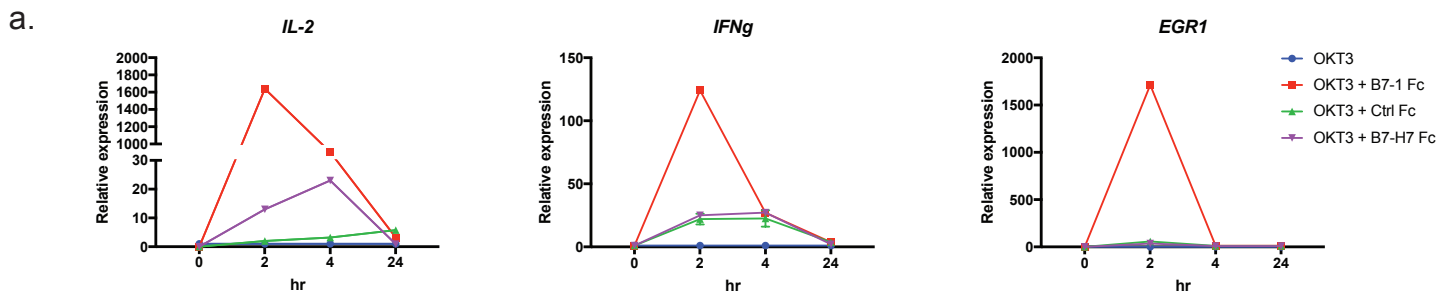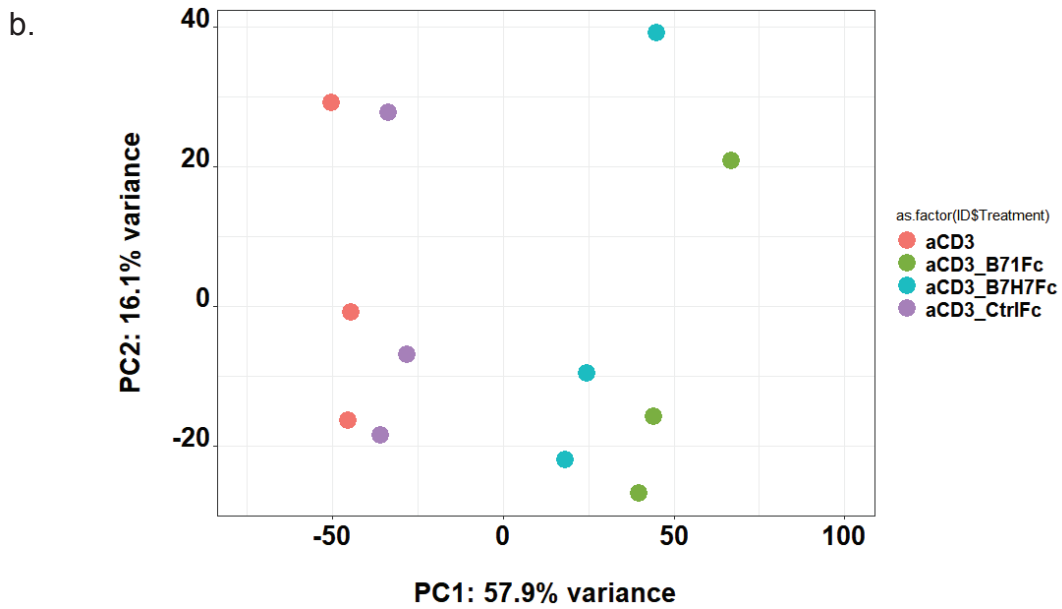

Supplementary Figure 2

a.

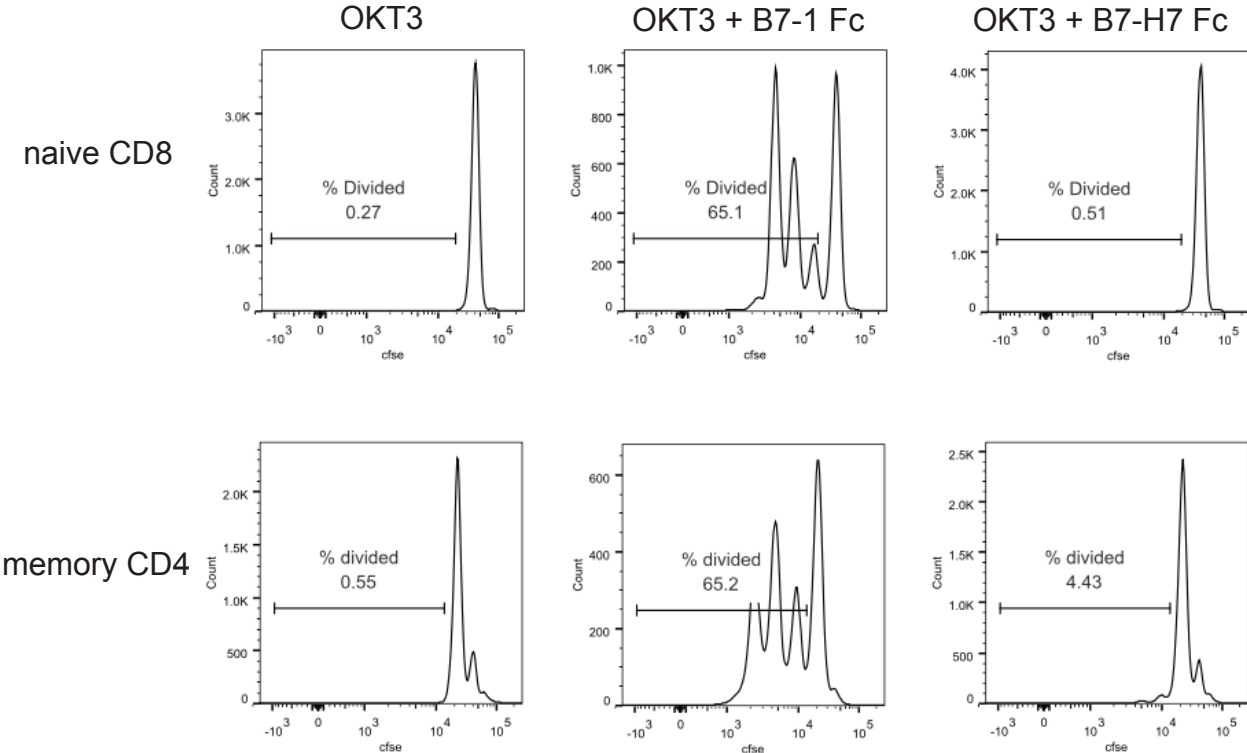

# Supplemental Figure 3

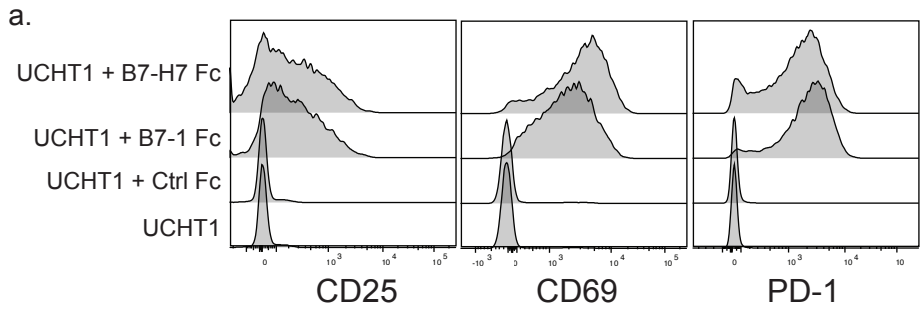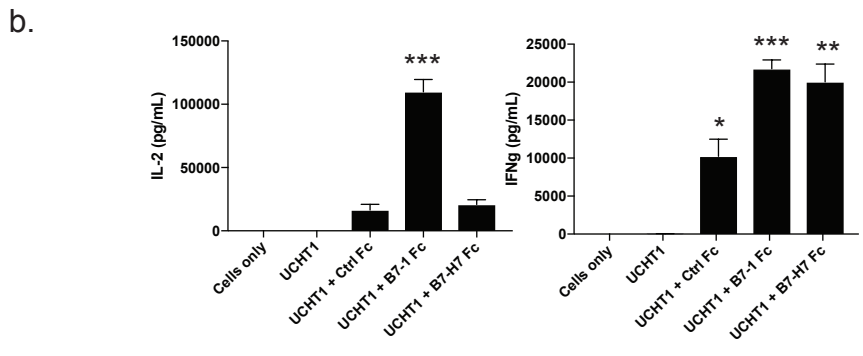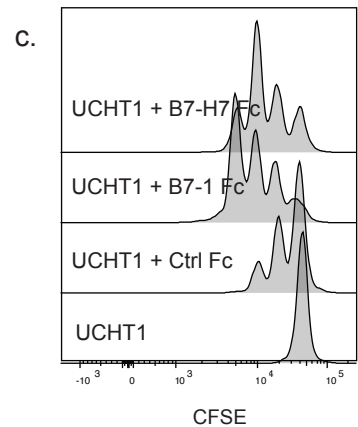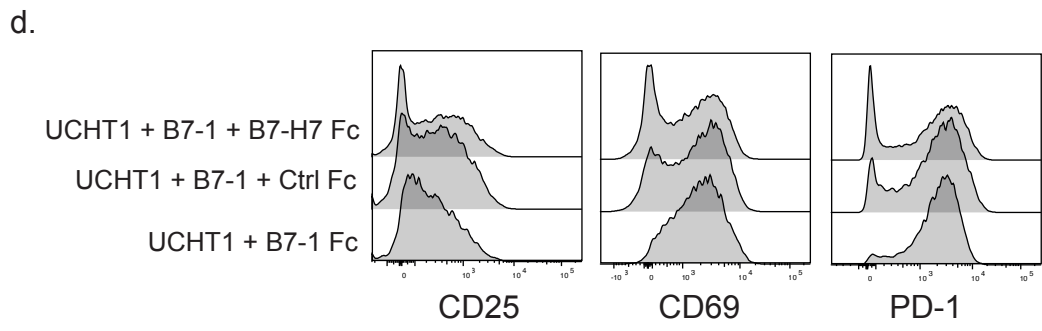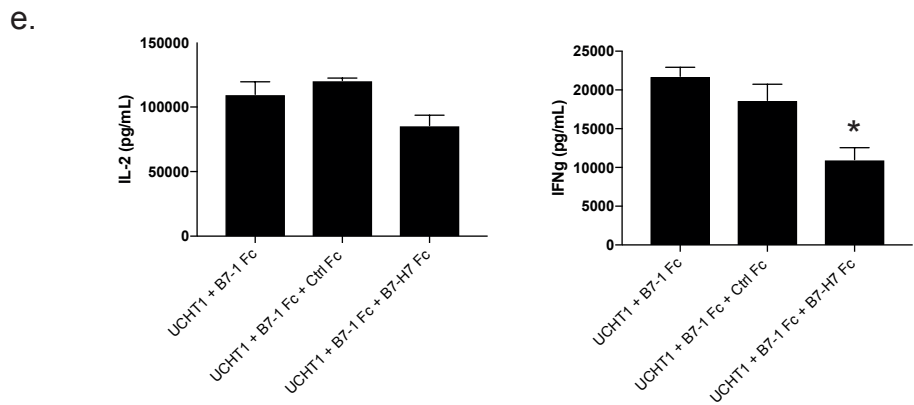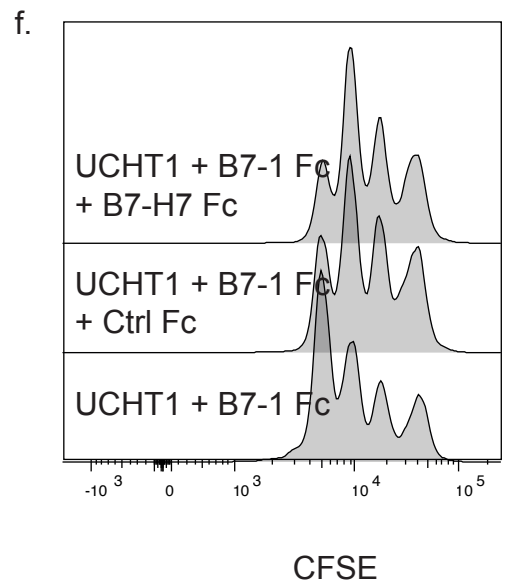

Supplement: 41423_2020_361_MOESM2_ESM.pdf [file 41423_2020_361_MOESM2_ESM.pdf]
